# Supplementary material
Source: PubMed Central journal article supplement (PMC8784649)
Supplement: mmc1.pdf [file mmc1.pdf]

**Cell, Volume 185**

**Supplemental information**

**SARS-CoV-2 vaccination induces immunological**

**T cell memory able to cross-recognize**

**variants from Alpha to Omicron**

**Alison Tarke, Camila H. Coelho, Zeli Zhang, Jennifer M. Dan, Esther Dawen Yu, Nils Methot, Nathaniel I. Bloom, Benjamin Goodwin, Elizabeth Phillips, Simon Mallal, John Sidney, Gilberto Filaci, Daniela Weiskopf, Ricardo da Silva Antunes, Shane Crotty, Alba Grifoni, and Alessandro Sette**

**Table S1. Related to Figures 1, 2, 3, 5 and 6.** Characteristics of the donor cohorts enrolled in this study.

|                                 | <b>Early COVID-19</b><br>(n=16) | <b>mRNA-1273</b><br>(n=33)         | <b>BNT162b2</b><br>(n=27)          | <b>Ad26.COVS.2.S</b><br>(n=28)     | <b>NVX-CoV2373</b><br>(n=8)       |
|---------------------------------|---------------------------------|------------------------------------|------------------------------------|------------------------------------|-----------------------------------|
| <b>Age (years)</b>              |                                 |                                    |                                    |                                    |                                   |
| Range;                          | 27-68;                          | 21-78;                             | 24-66;                             | 20-70                              | 18-60                             |
| Median ± IQR                    | 44±40                           | 42±29                              | 36±34                              | 50±27                              | 35±26                             |
| <b>Gender</b>                   |                                 |                                    |                                    |                                    |                                   |
| Male (%)                        | 44% (7/16)                      | 29% (6/21)                         | 40% (8/20)                         | 43% (13/28)                        | 62% (5/8)                         |
| Female (%)                      | 56% (9/16)                      | 71% (15/21)                        | 60% (12/20)                        | 57% (15/28)                        | 38% (3/8)                         |
| <b>Race or Ethnicity</b>        |                                 |                                    |                                    |                                    |                                   |
| White                           | 88% (14/16)                     | 61% (20/33)                        | 48% (13/27)                        | 71% (20/28)                        | 75% (6/8)                         |
| Hispanic or Latino              | 6% (1/16)                       | 21% (7/33)                         | 22% (6/27)                         | 18% (5/28)                         | 13% (1/8)                         |
| Asian                           | 0% (0/16)                       | 6% (2/33)                          | 22% (6/27)                         | 4% (1/28)                          | 0% (0/8)                          |
| Black                           | 0% (0/16)                       | 3% (1/33)                          | 4% (1/27)                          | 0% (0/28)                          | 0% (0/8)                          |
| More than one                   | 0% (0/16)                       | 9% (3/33)                          | 4% (1/27)                          | 7% (2/28)                          | 0% (0/8)                          |
| Not reported                    | 6% (1/16)                       | 0% (0/33)                          | 0% (0/27)                          | 0% (0/28)                          | 0% (0/8)                          |
| <b>Days post symptoms onset</b> | 21-43; 33±29                    | -                                  | -                                  | -                                  | -                                 |
| <b>Timepoint 1</b>              |                                 |                                    |                                    |                                    |                                   |
| # of donors                     | n=16                            | After 1 <sup>st</sup> dose<br>n=20 | After 1 <sup>st</sup> dose<br>n=20 | After 1 <sup>st</sup> dose<br>n=12 |                                   |
| dPV <sup>a</sup> Range;         | -                               | 4-21;                              | 10-52;                             | 14-21;                             | -                                 |
| Median ± IQR                    | -                               | 15±2                               | 15±4                               | 14±1                               |                                   |
| RBD IgG positive(%)             | 100%(16/16)                     | 95%                                | 95%                                | 58%                                |                                   |
| N IgG positive(%)               | -                               | 0%                                 | 5%                                 | 0%                                 |                                   |
| <b>Timepoint 2</b>              |                                 |                                    |                                    |                                    |                                   |
| # of donors                     |                                 | After 2 <sup>nd</sup> dose<br>n=20 | After 2 <sup>nd</sup> dose<br>n=20 | After 1 <sup>st</sup> dose<br>n=12 |                                   |
| dPV <sup>a</sup> Range;         | -                               | 13-20;                             | 08-19;                             | 39-68;                             | -                                 |
| Median ± IQR                    | -                               | 14±2                               | 14±1                               | 42±9                               |                                   |
| RBD IgG positive(%)             |                                 | 100%                               | 100%                               | 67%                                |                                   |
| N IgG positive(%)               |                                 | 0%                                 | 5%                                 | 8%                                 |                                   |
| <b>Timepoint 3</b>              |                                 |                                    |                                    |                                    |                                   |
| # of donors                     |                                 | After 2 <sup>nd</sup> dose<br>n=12 | After 2 <sup>nd</sup> dose<br>n=15 | After 1 <sup>st</sup> dose<br>n=15 | After 1 <sup>st</sup> dose<br>n=8 |
| dPV <sup>a</sup> Range;         | -                               | 58-86                              | 54-98                              | 102-108                            | 22-90                             |
| Median ± IQR                    | -                               | 77±4                               | 84±5                               | 105±2                              | 78±11                             |
| RBD IgG positive(%)             |                                 | 100%                               | 94%                                | 86%                                | 88%                               |
| N IgG positive(%)               |                                 | 0%                                 | 7%                                 | 14%                                | 0%                                |
| <b>Timepoint 4</b>              |                                 |                                    |                                    |                                    |                                   |
| # of donors                     |                                 | After 2 <sup>nd</sup> dose<br>n=9  | After 2 <sup>nd</sup> dose<br>n=4  |                                    |                                   |
| dPV <sup>a</sup> Range;         | -                               | 151-229                            | 169-187                            | -                                  | -                                 |
| Median ± IQR                    | -                               | 175±66                             | 179±12                             |                                    |                                   |
| RBD IgG positive(%)             |                                 | 100%                               | 100%                               |                                    |                                   |
| N IgG positive(%)               |                                 | 0%                                 | 0%                                 |                                    |                                   |

<sup>a</sup> Samples corresponding to the first and second time point are longitudinal samples from the same donors, while samples from time point 3 and 4 are cross-sectional samples derived from additional independent donors.



**Table S3. Related to Figures 1-6. List of amino acid mutations for each SARS-CoV-2 variant.**

| Protein | Position | Wuhan | B.1.1.7 | B.1.351 | P.1 | B.1.1.519 | B.1.617.1 | B.1.617.2 | C.37 | R.1 | B.1.427/429 | B.1.525 | B.1.526 | B.1.526.1 | B.1.621 | B.1.529 |
|---------|----------|-------|---------|---------|-----|-----------|-----------|-----------|------|-----|-------------|---------|---------|-----------|---------|---------|
| E       | 21       | L     |         |         |     |           |           |           |      |     |             | F       |         |           |         |         |
| E       | 71       | P     |         | L       |     |           |           |           |      |     |             |         |         |           |         |         |
| M       | 3        | D     |         |         |     |           |           |           |      |     |             |         |         |           |         | G       |
| M       | 19       | Q     |         |         |     |           |           |           |      |     |             |         |         |           |         | E       |
| M       | 28       | F     |         |         |     |           |           |           |      | L   |             |         |         |           |         | T       |
| M       | 63       | A     |         |         |     |           |           |           |      |     |             |         |         |           |         |         |
| M       | 162      | K     |         | N       |     |           |           |           |      |     |             |         |         |           |         |         |
| N       | 3        | D     | L       |         |     |           |           |           |      |     |             |         |         |           |         |         |
| N       | 12       | A     |         |         |     |           |           |           |      |     |             | G       |         |           |         |         |
| N       | 13       | P     |         | S       |     |           |           |           | L    |     |             |         |         |           |         | L       |
| N       | 31       | E     |         |         |     |           |           |           |      |     |             |         |         |           |         | -       |
| N       | 32       | R     |         | H       |     |           |           |           |      |     |             |         |         |           |         | -       |
| N       | 33       | S     |         |         |     |           |           |           |      |     |             |         |         |           |         | -       |
| N       | 63       | D     |         |         |     |           | G         |           |      |     |             |         |         |           |         |         |
| N       | 80       | P     |         |         | R   |           |           |           |      |     |             |         |         |           |         |         |
| N       | 187      | S     |         |         |     |           |           |           |      | L   |             |         |         |           |         |         |
| N       | 203      | R     | K       |         | K   | K         | M         | M         |      | K   | K           |         |         |           |         | K       |
| N       | 204      | G     | R       |         | R   | R         |           |           |      | R   | R           |         |         |           |         | R       |
| N       | 205      | T     |         |         |     |           |           |           |      |     |             |         |         |           | I       |         |
| N       | 212      | G     |         | C       |     |           |           |           |      |     |             |         |         |           |         |         |
| N       | 214      | G     |         |         |     |           |           |           | C    |     |             |         |         |           |         |         |
| N       | 234      | M     |         |         |     |           |           |           |      |     | I           |         | I       | I         |         |         |
| N       | 235      | S     | F       |         |     |           |           |           |      |     |             |         |         |           |         |         |
| N       | 377      | D     |         |         |     | Y         | Y         |           |      |     |             |         |         |           |         |         |
| N       | 418      | Q     |         |         |     |           |           |           |      | H   |             |         |         |           |         |         |
| nsp1    | 109      | P     |         | S       |     |           |           |           |      |     |             |         |         |           |         |         |
| nsp2    | 85       | T     |         | I       |     |           |           |           |      |     | I           |         | I       | I         |         |         |
| nsp2    | 339      | G     |         | S       |     |           |           |           |      |     |             |         |         |           |         |         |
| nsp2    | 366      | S     |         | T       |     |           |           |           |      |     |             |         |         |           |         |         |
| nsp2    | 427      | Q     |         | H       |     |           |           |           |      |     |             |         |         |           |         |         |
| nsp2    | 563      | E     |         | D       |     |           |           |           |      |     |             |         |         |           |         |         |
| nsp3    | 38       | K     |         |         |     |           |           |           |      |     |             |         |         |           |         | R       |
| nsp3    | 141      | P     |         |         |     | S         |           |           |      |     |             |         |         |           |         |         |
| nsp3    | 183      | T     | I       |         |     |           |           |           |      |     |             |         |         |           |         |         |
| nsp3    | 186      | T     |         |         | A   |           |           |           |      |     |             |         |         |           |         |         |
| nsp3    | 237      | T     |         |         |     |           |           |           |      |     |             |         |         |           | A       |         |
| nsp3    | 370      | S     |         |         | L   |           |           |           |      |     |             |         |         |           |         |         |
| nsp3    | 720      | T     |         |         |     |           |           |           |      |     |             |         |         |           | I       |         |
| nsp3    | 778      | P     |         |         |     |           |           |           |      |     | S           |         |         |           |         |         |
| nsp3    | 837      | K     |         | N       |     |           |           |           |      |     |             |         |         |           |         |         |
| nsp3    | 890      | A     | D       |         |     |           |           |           |      |     |             |         |         |           |         |         |
| nsp3    | 926      | C     |         | S       |     |           |           |           |      |     |             |         |         |           |         |         |
| nsp3    | 977      | K     |         |         | Q   |           |           |           |      |     |             |         |         |           |         |         |
| nsp3    | 1069     | V     |         |         |     |           |           |           |      |     |             |         |         |           |         | I       |
| nsp3    | 1180     | T     |         | I       |     |           |           |           |      |     |             |         |         |           |         |         |
| nsp3    | 1189     | T     |         |         |     |           |           |           |      |     |             | I       |         |           |         | -       |
| nsp3    | 1265     | S     |         |         |     |           |           |           |      |     |             |         |         |           |         | I       |
| nsp3    | 1266     | L     |         |         |     |           |           |           |      |     |             |         |         |           |         |         |
| nsp3    | 1412     | I     | T       |         |     |           |           |           |      |     |             |         |         |           |         |         |
| nsp3    | 1429     | T     |         |         |     | N         |           |           |      |     |             |         |         |           |         |         |
| nsp3    | 1469     | P     |         |         |     |           | S         |           | S    | V   |             |         |         |           |         |         |
| nsp3    | 1569     | F     |         |         |     |           |           |           |      |     |             |         |         |           |         |         |
| nsp3    | 1778     | N     |         | S       |     |           |           |           |      |     |             |         |         |           |         |         |
| nsp3    | 1892     | A     |         |         |     |           |           |           |      |     |             |         |         |           |         | T       |
| nsp4    | 395      | S     |         |         |     |           |           |           |      |     | T           |         |         |           |         |         |
| nsp4    | 399      | K     |         |         |     |           |           |           |      |     |             |         |         |           |         |         |
| nsp4    | 438      | L     |         |         |     |           |           |           | P    |     |             | P       | E       | P         | V       |         |
| nsp4    | 446      | A     |         |         |     |           |           |           |      |     |             |         |         |           |         |         |
| nsp4    | 492      | T     |         |         |     | I         |           |           | I    |     |             |         |         |           | I       | I       |
| nsp5    | 90       | K     |         | R       |     |           |           |           |      |     |             |         |         |           |         |         |
| nsp5    | 132      | P     |         |         |     |           |           |           |      |     |             |         |         |           |         | H       |
| nsp5    | 193      | A     |         | V       |     |           |           |           |      |     |             |         |         |           |         |         |
| nsp6    | 49       | I     |         |         |     | V         |           |           |      |     |             |         |         |           |         |         |
| nsp6    | 77       | T     |         |         |     |           | A         |           |      |     |             |         |         |           |         |         |
| nsp6    | 106      | S     | -       | -       | -   |           |           |           |      |     |             | -       | -       | -         |         | -       |
| nsp6    | 107      | G     | -       | -       | -   |           |           |           |      |     |             | -       | -       | -         |         | -       |
| nsp6    | 108      | F     | -       | -       | -   |           |           |           |      |     |             | -       | -       | -         |         | -       |
| nsp6    | 125      | L     |         |         |     |           |           |           |      |     | F           |         |         |           |         |         |
| nsp6    | 135      | G     |         | S       |     |           |           |           |      |     |             |         |         |           |         |         |
| nsp6    | 149      | V     |         | F       |     |           |           |           |      |     |             |         |         |           |         |         |
| nsp6    | 160      | Q     |         |         |     |           |           |           |      |     |             |         |         |           | R       |         |
| nsp6    | 167      | L     |         |         |     |           |           |           |      |     | F           |         |         |           |         |         |
| nsp6    | 189      | A     |         |         |     |           |           |           |      |     |             |         |         |           |         | V       |
| nsp6    | 278      | V     |         |         |     |           |           |           |      |     |             |         |         | I         |         |         |
| nsp9    | 35       | T     |         |         |     | I         |           |           |      |     |             |         |         |           |         |         |
| nsp10   | 105      | N     |         | K       |     |           |           |           |      |     |             |         |         |           |         |         |
| nsp12   | 314      | N     |         |         |     |           |           |           | L    | L   |             |         |         |           |         |         |
| nsp12   | 323      | P     | L       | L       | L   | L         | L         | L         |      |     | L           | F       | L       | L         | L       | I       |
| nsp12   | 671      | G     |         |         |     |           |           | S         |      |     |             |         |         |           |         |         |
| nsp13   | 53       | P     |         |         |     |           |           |           |      |     | L           |         |         |           |         |         |
| nsp13   | 77       | P     |         |         |     |           | L         |           |      |     |             |         |         |           |         |         |
| nsp13   | 88       | Q     |         |         |     |           |           |           |      |     |             |         | H       | H         |         |         |
| nsp13   | 209      | V     |         |         |     |           |           |           |      |     | F           |         |         |           |         |         |
| nsp13   | 260      | D     |         |         |     |           |           |           |      |     | Y           |         |         |           |         |         |
| nsp13   | 341      | E     |         |         | D   |           |           |           |      |     |             |         |         |           |         |         |
| nsp13   | 419      | P     |         |         |     |           |           |           |      |     |             |         |         |           | S       |         |
| nsp13   | 429      | M     |         |         |     |           | I         |           |      |     |             |         |         |           |         |         |
| nsp13   | 439      | G     |         |         |     |           |           |           |      | R   |             |         |         |           |         |         |
| nsp13   | 588      | T     |         | I       |     |           |           |           |      |     |             |         |         |           |         |         |
| nsp14   | 42       | I     |         |         |     |           |           |           |      |     |             |         |         |           |         | V       |
| nsp14   | 177      | L     |         | F       |     |           |           |           |      |     |             |         |         |           |         |         |
| nsp14   | 326      | F     |         |         |     |           |           |           |      |     | L           |         |         |           |         |         |
| nsp14   | 328      | V     |         | F       |     |           |           |           |      |     |             |         |         |           |         |         |
| nsp14   | 412      | P     |         |         |     |           |           |           |      | H   |             |         |         |           |         |         |
| nsp15   | 91       | D     |         |         |     |           |           |           |      |     |             | Y       |         |           |         |         |
| nsp15   | 259      | K     |         |         |     |           | R         |           |      |     |             |         |         |           |         |         |
| ORF3a   | 26       | S     |         |         |     | L         | L         |           |      |     |             |         |         |           |         |         |
| ORF3a   | 42       | P     |         |         |     |           |           |           |      |     |             |         | L       | L         |         |         |

|       |      |     |      |     |   |   |   |   |   |   |   |   |   |   |     |
|-------|------|-----|------|-----|---|---|---|---|---|---|---|---|---|---|-----|
| ORF3a | 57   | Q   |      | H   |   |   |   |   |   | H |   | H | H | H |     |
| ORF3a | 131  | W   |      | L   |   |   |   |   |   |   |   |   |   |   |     |
| ORF3a | 171  | S   |      | L   |   |   |   |   |   |   |   |   |   |   |     |
| ORF3a | 253  | S   |      |     | P |   |   |   |   |   |   |   |   |   |     |
| ORF3a | 256  | V   |      |     |   |   |   |   |   |   |   |   |   | I |     |
| ORF7a | 82   | V   |      |     |   |   | A | A |   |   |   |   |   |   |     |
| ORF7a | 93   | V   |      | F   |   |   |   |   |   |   |   |   |   |   |     |
| ORF7a | 120  | T   |      |     |   |   |   | I |   |   |   |   |   |   |     |
| ORF8  | 11   | T   |      |     |   |   |   |   |   |   | I | I |   | K |     |
| ORF8  | 27   |     | stop |     |   |   |   |   |   |   |   |   |   |   |     |
| ORF8  | 38   | P   |      |     |   |   |   |   |   |   |   |   |   |   | S   |
| ORF8  | 51   | A   |      |     |   |   |   |   |   |   |   | S |   |   | S   |
| ORF8  | 67   | S   |      |     |   |   |   |   |   |   |   |   |   |   | F   |
| ORF8  | 92   | E   |      |     | K |   |   |   |   |   |   |   |   |   |     |
| ORF8  | 121  | I   |      | L   |   |   |   |   |   |   |   |   |   |   |     |
| S     | 5    | L   |      |     |   |   |   |   |   |   | F |   |   |   |     |
| S     | 13   | S   |      |     |   |   |   |   |   | I |   |   |   |   |     |
| S     | 18   | L   |      | F   | F |   |   |   |   |   |   |   |   |   |     |
| S     | 19   | T   |      |     |   |   |   | R |   |   |   |   |   |   |     |
| S     | 20   | T   |      |     | N |   |   |   |   |   |   |   |   |   |     |
| S     | 26   | P   |      |     | S |   |   |   |   |   |   |   |   |   |     |
| S     | 52   | Q   |      |     |   |   |   |   |   |   | R |   |   |   |     |
| S     | 67   | A   |      |     |   |   |   |   |   |   |   |   |   |   | V   |
| S     | 69   | H   | -    |     |   |   |   |   |   |   |   |   |   |   | -   |
| S     | 70   | V   | -    |     |   |   |   |   |   |   |   |   |   |   | -   |
| S     | 75   | G   |      |     |   |   |   | V |   |   |   |   |   |   | -   |
| S     | 76   | T   |      |     |   |   |   | I |   |   |   |   |   |   |     |
| S     | 80   | D   |      | A   |   |   |   |   |   |   |   |   |   |   |     |
| S     | 95   | T   |      |     |   |   |   |   |   |   |   | I | G | I | I   |
| S     | 138  | D   |      |     | Y |   |   |   |   |   |   |   |   |   |     |
| S     | 142  | G   |      |     |   |   |   |   |   |   |   |   |   |   | D   |
| S     | 143  | V   |      |     |   |   |   |   |   |   |   |   |   |   | -   |
| S     | 144  | Y   |      |     |   |   |   |   |   |   |   |   |   |   | -   |
| S     | 145  | Y   | -    |     |   |   |   |   |   |   |   |   |   | S | -   |
| S     | 152  | W   |      |     |   |   |   | L | C |   |   |   |   | N | -   |
| S     | 154  | E   |      |     |   |   | K |   |   |   |   |   |   |   | -   |
| S     | 157  | F   |      |     |   |   |   |   |   |   |   | S |   |   |     |
| S     | 190  | R   |      |     | S |   |   |   |   |   |   |   |   |   |     |
| S     | 211  | N   |      |     |   |   |   |   |   |   |   |   |   |   | -   |
| S     | 212  | L   |      |     |   |   |   |   |   |   |   |   |   |   | I   |
| S     | 214  | ins |      |     |   |   |   |   |   |   |   |   |   |   | EPE |
| S     | 215  | D   |      | G/H |   |   |   |   |   |   |   |   |   |   |     |
| S     | 241  | L   | -    |     |   |   |   |   |   |   |   |   |   |   |     |
| S     | 242  | L   | -    |     |   |   |   |   |   |   |   |   |   |   |     |
| S     | 243  | A   | -    |     |   |   |   |   |   |   |   |   |   |   |     |
| S     | 246  | R   |      |     |   |   |   | N |   |   |   |   |   |   |     |
| S     | 247  | S   |      |     |   |   |   | - |   |   |   |   |   |   |     |
| S     | 248  | Y   |      |     |   |   |   | - |   |   |   |   |   |   |     |
| S     | 249  | L   |      |     |   |   |   | - |   |   |   |   |   |   |     |
| S     | 250  | T   |      |     |   |   |   | - |   |   |   |   |   |   |     |
| S     | 251  | P   |      |     |   |   |   | - |   |   |   |   |   |   |     |
| S     | 252  | G   |      |     |   |   |   | - |   |   |   |   |   |   |     |
| S     | 253  | D   |      |     |   |   |   | - |   |   |   | G |   |   |     |
| S     | 339  | G   |      |     |   |   |   |   |   |   |   |   |   |   | D   |
| S     | 346  | R   |      |     |   |   |   |   |   |   |   |   |   | K |     |
| S     | 371  | S   |      |     |   |   |   |   |   |   |   |   |   |   | L   |
| S     | 373  | S   |      |     |   |   |   |   |   |   |   |   |   |   | P   |
| S     | 375  | S   |      |     |   |   |   |   |   |   |   |   |   |   | F   |
| S     | 417  | K   |      | N   | T |   |   |   |   |   |   |   |   |   | N   |
| S     | 440  | N   |      |     |   |   |   |   |   |   |   |   |   |   | K   |
| S     | 446  | G   |      |     |   |   |   |   |   |   |   |   |   |   | S   |
| S     | 452  | L   |      |     |   |   |   | R | R | Q |   | R |   |   |     |
| S     | 477  | S   |      |     |   |   |   |   |   |   |   |   |   |   | N   |
| S     | 478  | T   |      |     |   | K |   |   |   |   |   |   |   |   | K   |
| S     | 484  | E   |      | K   | K |   |   | Q |   |   |   |   |   |   | A   |
| S     | 490  | F   |      |     |   |   |   |   | S |   | K |   | K |   |     |
| S     | 493  | Q   |      |     |   |   |   |   |   |   |   |   |   |   | R   |
| S     | 496  | G   |      |     |   |   |   |   |   |   |   |   |   |   | S   |
| S     | 498  | Q   |      |     |   |   |   |   |   |   |   |   |   |   | R   |
| S     | 501  | N   | Y    | Y   | Y |   |   |   |   |   |   |   |   | Y | Y   |
| S     | 505  | Y   |      |     |   |   |   |   |   |   |   |   |   |   | H   |
| S     | 547  | T   |      |     |   |   |   |   |   |   |   |   |   |   | K   |
| S     | 570  | A   | D    |     |   |   |   |   |   |   |   |   |   |   |     |
| S     | 614  | D   | G    | G   | G | G | G | G | G | G | G | G | G | G | G   |
| S     | 655  | H   |      | Y   |   |   |   |   |   |   |   |   |   |   | Y   |
| S     | 677  | Q   |      |     |   |   |   |   |   |   | H |   |   |   |     |
| S     | 679  | N   |      |     |   |   |   |   |   |   |   |   |   |   | K   |
| S     | 681  | P   | H    |     |   | H | R | R |   |   |   |   |   | H | H   |
| S     | 701  | A   |      | V   |   |   |   |   |   |   |   | V |   |   |     |
| S     | 716  | T   | I    |     |   |   |   |   |   |   |   |   |   |   |     |
| S     | 732  | T   |      |     |   | A |   |   |   |   |   |   |   |   |     |
| S     | 764  | N   |      |     |   |   |   |   |   |   |   |   |   |   | K   |
| S     | 769  | G   |      |     |   |   |   |   | V |   |   |   |   |   |     |
| S     | 796  | D   |      |     |   |   |   |   |   |   |   |   |   |   | Y   |
| S     | 856  | N   |      |     |   |   |   |   |   |   |   |   |   |   | K   |
| S     | 859  | T   |      |     |   |   |   | N |   |   |   |   | N |   |     |
| S     | 888  | F   |      |     |   |   |   |   |   |   | L |   |   |   |     |
| S     | 938  | L   |      |     |   |   |   |   |   | F |   |   |   |   |     |
| S     | 950  | D   |      |     |   |   |   | N |   |   |   |   | H | N |     |
| S     | 954  | Q   |      |     |   |   |   |   |   |   |   |   |   |   |     |
| S     | 969  | N   |      |     |   |   |   |   |   |   |   |   |   |   | H   |
| S     | 981  | L   |      |     |   |   |   |   |   |   |   |   |   |   | K   |
| S     | 982  | S   | A    |     |   |   |   |   |   |   |   |   |   |   | F   |
| S     | 1027 | T   |      |     |   | I |   |   |   |   |   |   |   |   |     |
| S     | 1071 | Q   |      |     |   |   |   | H |   |   |   |   |   |   |     |
| S     | 1118 | D   | H    |     |   |   |   |   |   |   |   |   |   |   |     |
| S     | 1176 | V   |      |     |   | F |   |   |   |   |   |   |   |   |     |
| S     | 1191 | K   |      |     |   |   |   |   |   | N |   |   |   |   |     |

# of mutations per variant    22    43    25    11    15    16    21    12    21    12    17    22    21    60
